# Supplementary material for: 2D molecular crystal templated organic p–n heterojunctions for high-performance ambipolar organic field-effect transistors
Source: Royal Society of Chemistry journal article supplement (doi:10.1039/d1tc00715g), 2021-01-01
Supplement: d1tc00715g1.pdf [file d1tc00715g1.pdf]

## Electronic Supplementary Information

### 2D Molecular Crystal Templated Organic p-n Heterojunctions for High-Performance Ambipolar Organic Field-Effect Transistors

*Siyu Guo,<sup>‡a</sup> Jiarong Yao,<sup>‡a</sup> Ying Wang,<sup>a</sup> Lijuan Zhang,<sup>a</sup> Fei Zhai,<sup>b</sup> Xiali Zhang,<sup>c</sup> Yiyu Feng,<sup>b</sup> Wei Feng,<sup>b</sup> Xiaotao Zhang,<sup>a</sup> Jiansheng Jie,<sup>c</sup> Fangxu Yang,<sup>\*a</sup> Rongjin Li<sup>\*a</sup> and Wenping Hu<sup>a</sup>*

<sup>a</sup> Tianjin Key Laboratory of Molecular Optoelectronic Sciences, Department of Chemistry, School of Science, Tianjin University & Collaborative Innovation Center of Chemical Science and Engineering, Tianjin 300072, China.

<sup>b</sup> School of Materials Science and Engineering, Tianjin University, Tianjin 300072, China

<sup>c</sup> Institute of Functional Nano & Soft Materials (FUNSOM), Jiangsu Key Laboratory for Carbon-Based Functional Materials & Devices Soochow University, Suzhou 215123, China.

E-mail: yangfangxu@tju.edu.cn; lirj@tju.edu.cn

## Contents

- (1) **Table S1.** Unipolar thin film OFETs of F<sub>16</sub>CuPc.
- (2) **Table S2.** Bilayer aOFETs adopting F<sub>16</sub>CuPc as the n-type semiconductor.
- (3) **Table S3.** The threshold voltages of the OFETs.
- (4) **Fig. S1** A schematic energy level diagram of the F<sub>16</sub>CuPc/C6-DPA heterojunction.
- (5) **Fig. S2** AFM images of BPE-PTCDI (10 nm) deposited on SiO<sub>2</sub> and 2DMC of C6-DPA.
- (6) **Fig. S3** Device performance of OFETs based on thermally evaporated film of BPE-PTCDI.
- (7) **Fig. S4** Device performance of aOFETs based on BPE-PTCDI (10 nm)/C6-DPA.
- (8) **Fig. S5** POM, AFM and XRD of 2DMC of C8-BTBT.
- (9) **Fig. S6** Device performance of OFETs based on 2DMC of C8-BTBT.
- (10) **Fig. S7** AFM image of F<sub>16</sub>CuPc (15 nm) deposited on 2DMC of C8-BTBT.
- (11) **Fig. S8** Device performance of aOFETs based on F<sub>16</sub>CuPc (15 nm)/C8-BTBT.
- (12) **Fig. S9** Magnified output characteristics of F<sub>16</sub>CuPc (10 nm)/C6-DPA aOFETs.
- (13) **Fig. S10** Mobility distribution of the devices of F<sub>16</sub>CuPc (10 nm)/C6-DPA aOFETs.
- (14) **Fig. S11** Device performance of OFETs based on thermally evaporated film of F<sub>16</sub>CuPc.
- (15) **Fig. S12** Device performance of OFETs based on 2DMC of C6-DPA.
- (16) **Fig. S13** Hysteresis curves of C6-DPA, F<sub>16</sub>CuPc and their heterojunction.
- (17) **Fig. S14** AFM images of thermally evaporated films of C6-DPA and F<sub>16</sub>CuPc/C6-DPA.
- (18) **Fig. S15** Device performance of OFET based on thermally evaporated film of C6-DPA.
- (19) **Fig. S16** Device performance of OFET based on thermally evaporated films of F<sub>16</sub>CuPc/C6-DPA.

**Table S1** Unipolar thin film OFETs of F<sub>16</sub>CuPc.

| Method              | Fabrication condition                                                           | Mobility<br>(cm <sup>2</sup> V <sup>-1</sup> s <sup>-1</sup> ) | Ref. |
|---------------------|---------------------------------------------------------------------------------|----------------------------------------------------------------|------|
| Thermal evaporation | Substrate temperature = 125°C                                                   | 0.03                                                           | 1    |
| Thermal evaporation | Substrate temperature = 120°C                                                   | 0.011                                                          | 2    |
| Thermal evaporation | With silk fibroin as the gate dielectric                                        | 0.39                                                           | 3    |
| Thermal evaporation | With C <sub>60</sub> as floating gate layer on a flexible substrate             | 0.0018                                                         | 4    |
| Thermal evaporation | <i>p</i> -6P film served as the inducing layer<br>Substrate temperature = 110°C | 0.27                                                           | 5    |
| Thermal evaporation | <i>p</i> -6P film served as the inducing layer<br>Substrate temperature = 150°C | 0.12-0.5                                                       | 6    |

**Table S2** Bilayer aOFETs adopting F<sub>16</sub>CuPc as the n-type semiconductor.

| P type material       | $\mu_{h, \max}$<br>(cm <sup>2</sup> V <sup>-1</sup> s <sup>-1</sup> ) | Device structure                                                             | Preparation method                                                                              | $\mu_{e, \max}$<br>(cm <sup>2</sup> V <sup>-1</sup> s <sup>-1</sup> ) | Ref.      |
|-----------------------|-----------------------------------------------------------------------|------------------------------------------------------------------------------|-------------------------------------------------------------------------------------------------|-----------------------------------------------------------------------|-----------|
| CuPc                  | $1 \times 10^{-6}$                                                    | CuPc(10 nm)/Au/F <sub>16</sub> CuPc(2 nm)/SiO <sub>2</sub>                   | Thermal evaporation                                                                             | $1 \times 10^{-6}$                                                    | 7         |
| CuPc                  | $1.44 \times 10^{-3}$                                                 | Au/CuPc(30 nm)/F <sub>16</sub> CuPc(10 nm)/SiO <sub>2</sub>                  | Thermal evaporation                                                                             | $9.97 \times 10^{-4}$                                                 | 8         |
| CuPc                  | $7.8 \times 10^{-4}$                                                  | Au/F <sub>16</sub> CuPc(25 nm)/CuPc(5 nm)/SiO <sub>2</sub>                   | Thermal evaporation                                                                             | $4.6 \times 10^{-4}$                                                  | 9         |
| BP2T                  | $4.0 \times 10^{-2}$                                                  | Au/F <sub>16</sub> CuPc(20 nm)/BP2T(3 nm)/SiO <sub>2</sub>                   | Thermal evaporation                                                                             | $3.6 \times 10^{-2}$                                                  | 10        |
| CuPc                  | N/A                                                                   | F <sub>16</sub> CuPc(10 nm)/Au/CuPc(20 nm)/SiO <sub>2</sub>                  | Thermal evaporation                                                                             | $1.12 \times 10^{-2}$                                                 | 11        |
| <i>p</i> -6P          | N/A                                                                   | Au/F <sub>16</sub> CuPc(20 nm)/ <i>p</i> -6P(1 nm)/SiO <sub>2</sub>          | Thermal evaporation                                                                             | $1.1 \times 10^{-1}$                                                  | 12        |
| BP2T                  | $1.2 \times 10^{-1}$                                                  | Au/F <sub>16</sub> CuPc(20 nm)/BP2T(5 nm)/SiO <sub>2</sub>                   | Thermal evaporation                                                                             | $2.5 \times 10^{-2}$                                                  | 13        |
| CuPc                  | $2.96 \times 10^{-3}$                                                 | Au/F <sub>16</sub> CuPc(5 nm)/CuPc(15 nm)/SiO <sub>2</sub>                   | Thermal evaporation                                                                             | $9.49 \times 10^{-3}$                                                 | 14        |
| PhT2                  | $3.4 \times 10^{-2}$                                                  | Au/F <sub>16</sub> CuPc(20 nm)/PhT2(2 nm)/SiO <sub>2</sub>                   | Thermal evaporation                                                                             | $3.0 \times 10^{-2}$                                                  | 15        |
| CuPc                  | $2.91 \times 10^{-2}$                                                 | Au/CuPc(20 nm)/F <sub>16</sub> CuPc(5 nm)/OTS-SiO <sub>2</sub>               | Thermal evaporation                                                                             | $1.04 \times 10^{-2}$                                                 | 16        |
| CuPc                  | $7 \times 10^{-2}$                                                    | Au/F <sub>16</sub> CuPc(87 nm)/CuPc(56 nm)/OTS-SiO <sub>2</sub>              | Physical vapor transport                                                                        | $5 \times 10^{-2}$                                                    | 17        |
| CuPc                  | $1.30 \times 10^{-3}$                                                 | Au/CuPc(10 nm)/F <sub>16</sub> CuPc(10 nm)/SiO <sub>2</sub>                  | Thermal evaporation                                                                             | $1.30 \times 10^{-2}$                                                 | 18        |
| CuPc                  | $3.1 \times 10^{-3}$                                                  | Au/MoO <sub>3</sub> /CuPc(7 nm)/F <sub>16</sub> CuPc(27 nm)/SiO <sub>2</sub> | Thermal evaporation                                                                             | $2.5 \times 10^{-3}$                                                  | 19        |
| C <sub>10</sub> -DNTT | 8.97                                                                  | Au/F <sub>16</sub> CuPc(20 nm)/C <sub>10</sub> -DNTT/SiO <sub>2</sub>        | F <sub>16</sub> CuPc by thermal evaporation,<br>C <sub>10</sub> -DNTT by dual solution shearing | $6 \times 10^{-2}$                                                    | 20        |
| CuPc                  | $2.6 \times 10^{-2}$                                                  | F <sub>16</sub> CuPc(5 nm)/CuPc(11 nm)/Pt/SiO <sub>2</sub>                   | Thermal evaporation                                                                             | $1.4 \times 10^{-2}$                                                  | 21        |
| C6-DPA                | 3.97                                                                  | F <sub>16</sub> CuPc(10 nm)/Au/C6-DPA(9 nm)/SiO <sub>2</sub>                 | F <sub>16</sub> CuPc by thermal evaporation,<br>C6-DPA by SCS                                   | $5.6 \times 10^{-1}$                                                  | This work |

**Table S3** The threshold voltages of the OFETs.

| Device                        | $V_{th}$ (V) |
|-------------------------------|--------------|
| C6-DPA (p-type)               | -13          |
| Heterojunction (p-channel)    | 1            |
| F <sub>16</sub> CuPc (n-type) | 20           |
| Heterojunction (n-channel)    | 5            |

The threshold voltages of the OFETs were deduced from Fig. S12b, Fig. 4b, Fig. S11b, and Fig. 4c, respectively.

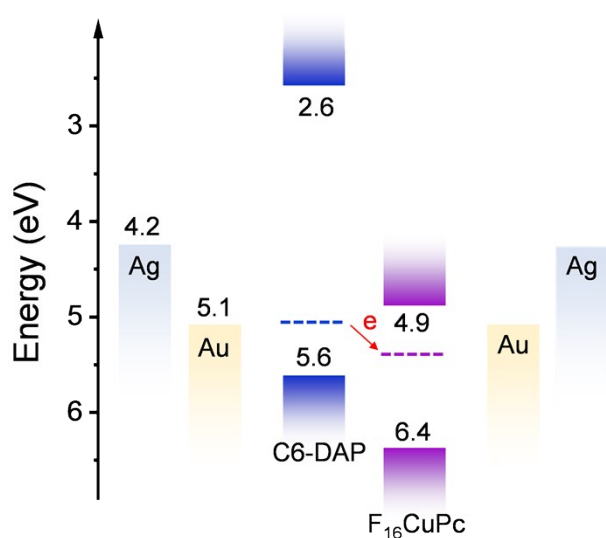

**Fig. S1** A schematic energy level diagram of the F<sub>16</sub>CuPc and C6-DPA.<sup>22-23</sup>

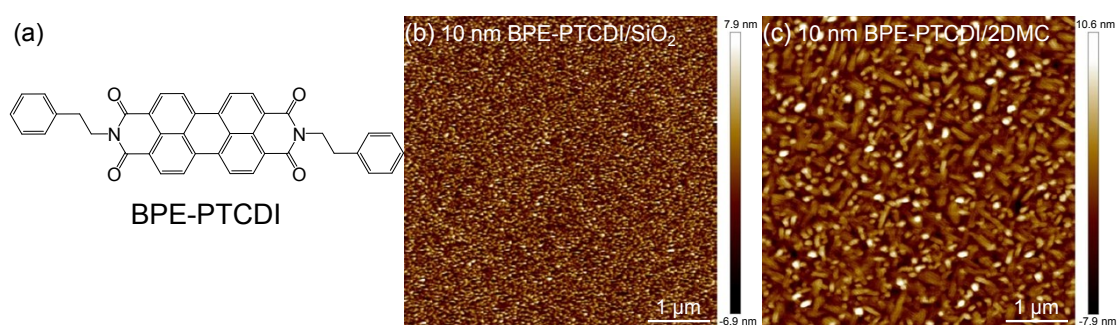

**Fig. S2** (a) The chemical structure of BPE-PTCDI. AFM images of (b) 10 nm BPE-PTCDI deposited on SiO<sub>2</sub>, (c) 10 nm of BPE-PTCDI deposited on 2DMC of C6-DPA, respectively.

BPE-PTCDI (10 nm) deposited on SiO<sub>2</sub>/Si exhibited small and randomly-oriented spherical grains with high density of grain boundaries (Fig. S2b). The morphology changed prominently when BPE-PTCDI (10 nm) was deposited on 2DMC of C6-DPA (Fig. S2c).

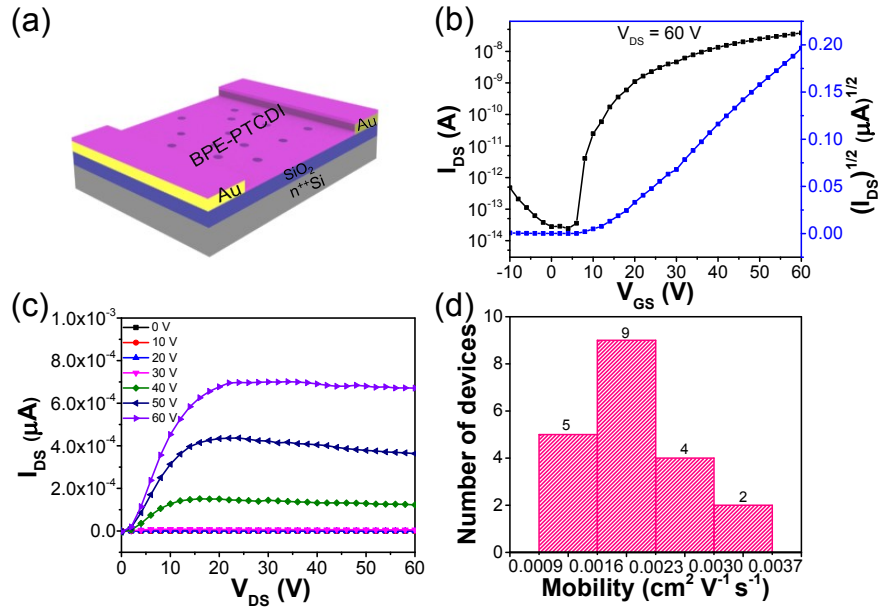

**Fig. S3** (a) Schematic of an OFET of BPE-PTCDI. (b) Typical transfer and (c) output curves of BPE-PTCDI. The channel length was 110  $\mu m$  and the channel width was 131  $\mu m$ . (d) Histogram of the mobility of 20 BPE-PTCDI OFETs. The average electron mobility was  $2.02 \times 10^{-3} cm^2 V^{-1} s^{-1}$  among 20 devices, and the highest value was  $3.46 \times 10^{-3} cm^2 V^{-1} s^{-1}$ .

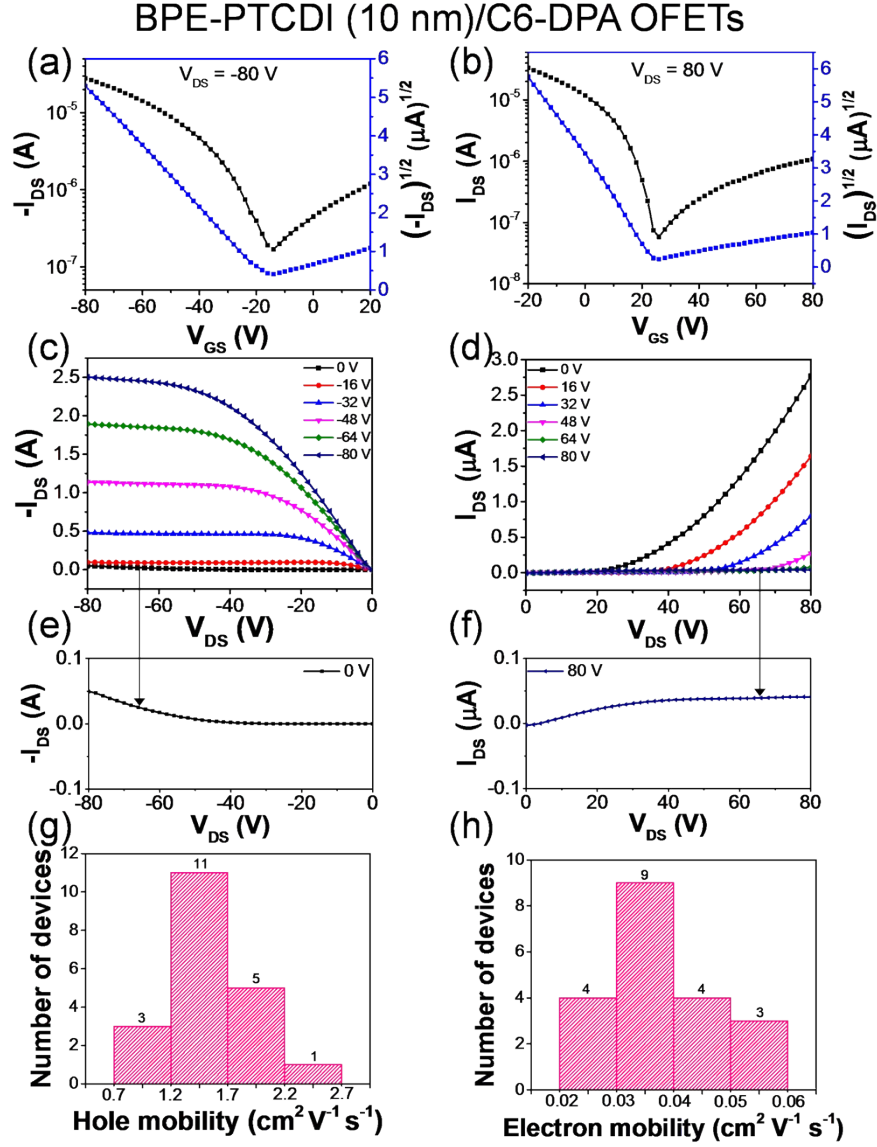

**Fig. S4** (a) Typical transfer and (c) output characteristics of p-channel operation mode under negative drain bias. (b) Typical transfer and (d) output characteristics of n-channel operation mode under positive drain bias. The channel length was 117  $\mu m$  and the channel width was 136  $\mu m$ . (e and f) Magnified output characteristics of p-channel operation mode of (c) at  $V_{GS} = 0$  V and n-channel operation mode of (d) at  $V_{GS} = 80$  V, respectively. (g and h) Mobility distribution of BPE-PTCDI (10 nm)/C6-DPA aOFETs in p-channel operation mode and n-channel operation mode, respectively.

The maximum (average) mobility for p-channel and n-channel was 2.61 (1.60)  $cm^2 V^{-1} s^{-1}$  and  $5.60 \times 10^{-2}$  ( $3.85 \times 10^{-2}$ )  $cm^2 V^{-1} s^{-1}$ , respectively. It was noted that the mobility of BPE-PTCDI increased over one order of magnitude compared with that of the unipolar devices (Fig. S3).

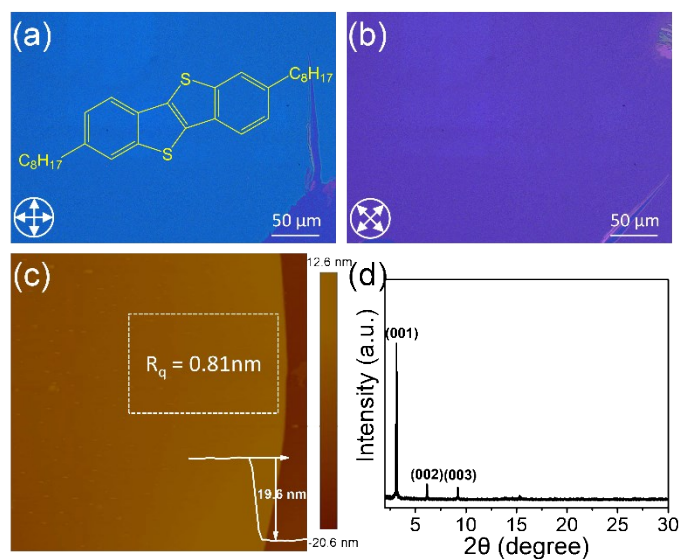

**Fig. S5** (a and b) POM images, (c) AFM image and (d) XRD of a 2DMC of C8-BTBT.

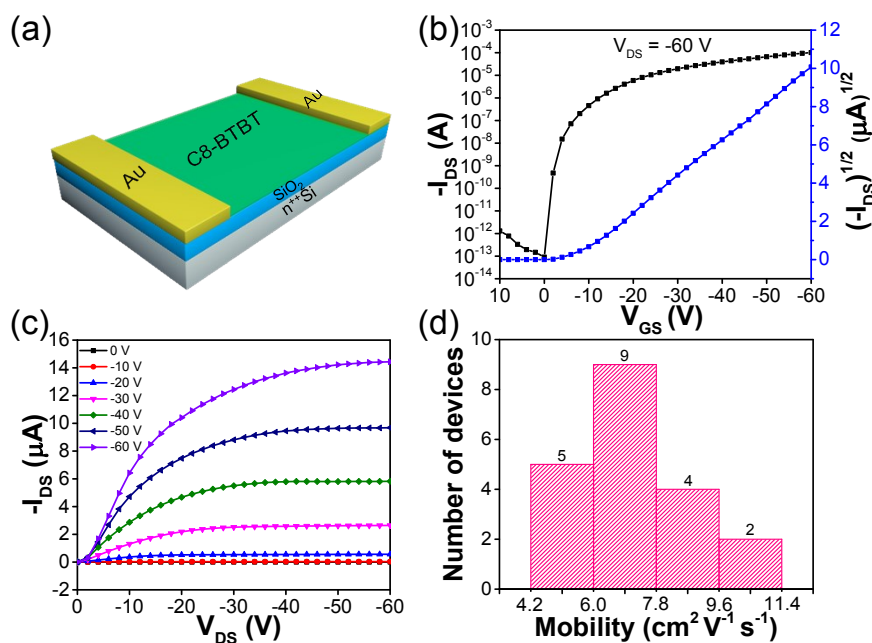

**Fig. S6** (a) Schematic of an OFET of C8-BTBT. (b) Typical transfer and (c) output curves of C8-BTBT. The channel length was 161  $\mu m$  and the channel width was 139  $\mu m$ . (d) Histogram of the mobility of 20 C8-BTBT OFETs. The average electron mobility was 7.07  $cm^2 V^{-1} s^{-1}$  among 20 devices, and the highest value was 11.33  $cm^2 V^{-1} s^{-1}$ .

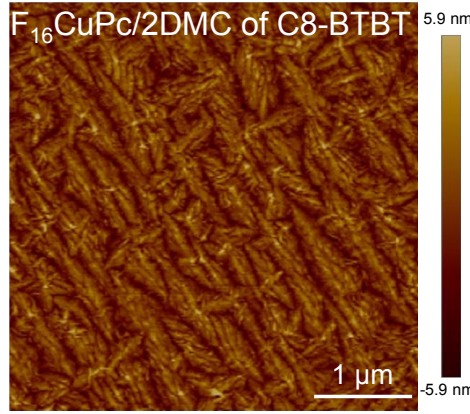

**Fig. S7** AFM image of  $F_{16}CuPc$  (15 nm) deposited on 2DMC of C8-BTBT.  $F_{16}CuPc$  deposited on 2DMCs of C8-BTBT also exhibited micrometer-sized grains (grain size  $\approx 0.3\sim 1.6$   $\mu m$ ).

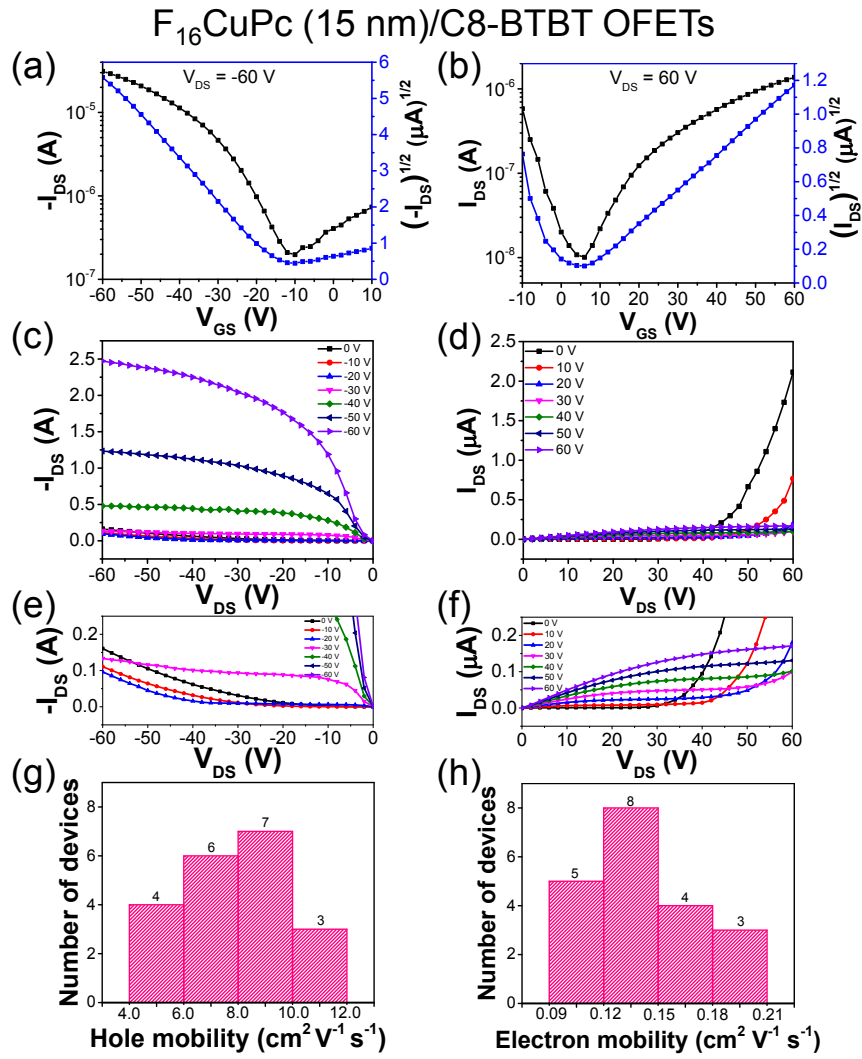

**Fig. S8** (a) Typical transfer and (c) output characteristics of p-channel operation mode under

negative drain bias. (b) Typical transfer and (d) output characteristics of n-channel operation mode under positive drain bias. The channel length was 149  $\mu\text{m}$  and the channel width was 102  $\mu\text{m}$ . (e and f) Magnified output characteristics of p-channel operation mode and n-channel operation mode, respectively. (g and h) Mobility distribution of  $\text{F}_{16}\text{CuPc}$  (15 nm)/C8-BTBT aOFETs in p-channel operation mode and n-channel operation mode, respectively.

The maximum (average) mobility for p-channel and n-channel was 11.77 (7.35)  $\text{cm}^2 \text{V}^{-1} \text{s}^{-1}$  and 0.20 (0.13)  $\text{cm}^2 \text{V}^{-1} \text{s}^{-1}$ , respectively. It was noted that the mobility of  $\text{F}_{16}\text{CuPc}$  increased about one order of magnitude compared with that of the unipolar devices (Fig. S11).

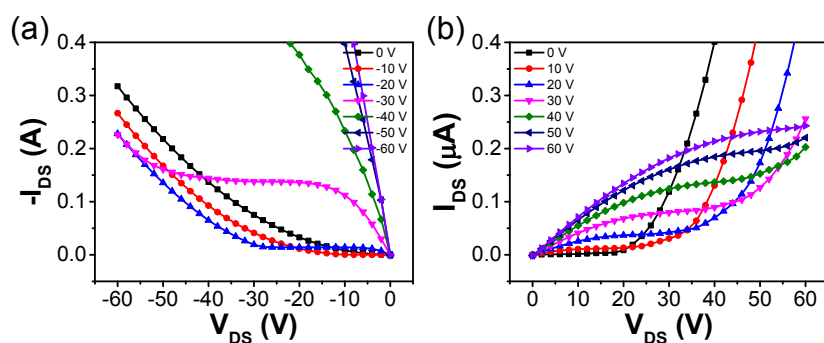

**Fig. S9** (a and b) Magnified output characteristics of  $\text{F}_{16}\text{CuPc}$  (10 nm)/C6-DPA aOFET of Fig. 4 (d and e), respectively.

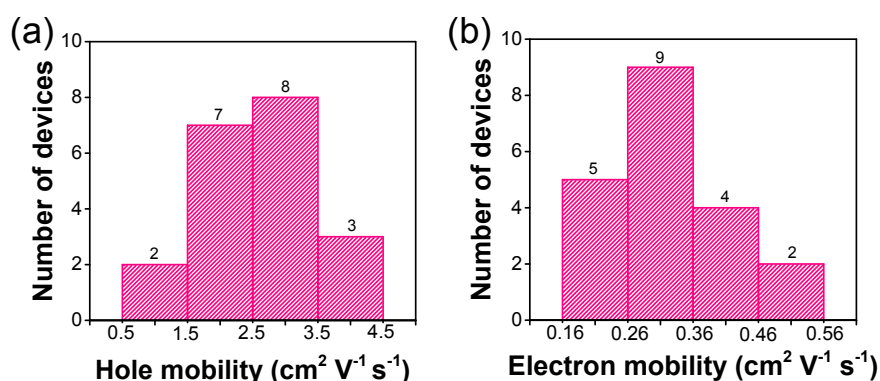

**Fig. S10** (a and b) Mobility distribution of  $\text{F}_{16}\text{CuPc}$  (10 nm)/C6-DPA aOFETs in p-channel operation mode and n-channel operation mode, respectively.

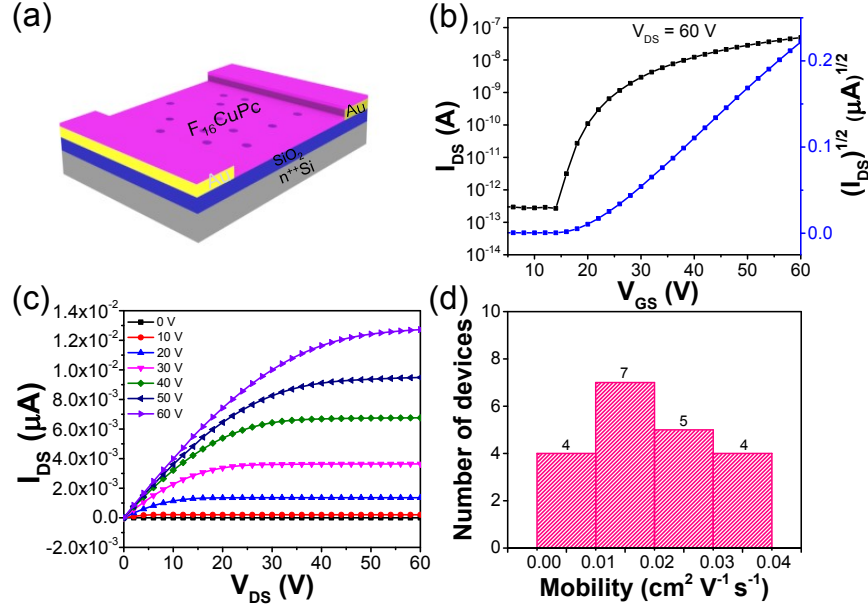

**Fig. S11** (a) Schematic of an OFET of F<sub>16</sub>CuPc. (b) Typical transfer and (c) output curves of F<sub>16</sub>CuPc. The channel length was 116 μm and the channel width was 93 μm. (d) Histogram of the mobility of 20 F<sub>16</sub>CuPc OFETs. The average electron mobility was  $1.95 \times 10^{-2} \text{ cm}^2 \text{ V}^{-1} \text{ s}^{-1}$  among 20 devices, and the highest value was  $3.60 \times 10^{-2} \text{ cm}^2 \text{ V}^{-1} \text{ s}^{-1}$ .

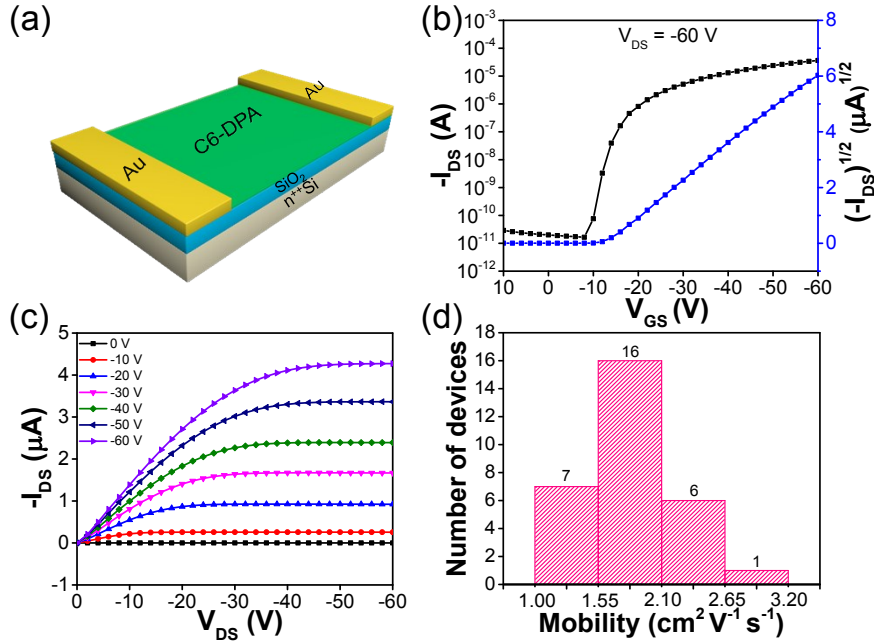

**Fig. S12** (a) Schematic of an OFET of 2DMC of C6-DPA. (b) Typical transfer and (c) output curves of 2DMC of C6-DPA. The channel length was 97 μm and the channel width was 105 μm. (d) Histogram of the mobility of 30 C6-DPA OFETs. The average hole mobility was  $1.85 \text{ cm}^2 \text{ V}^{-1} \text{ s}^{-1}$  among 30 devices, and the highest value was  $3.16 \text{ cm}^2 \text{ V}^{-1} \text{ s}^{-1}$ .

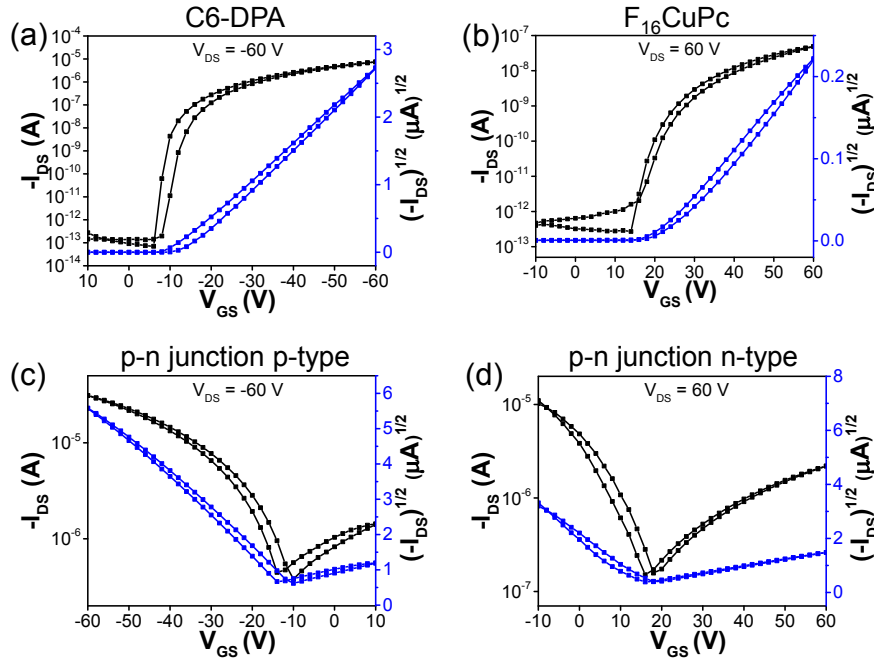

**Fig. S13** Hysteresis curves of C6-DPA, F<sub>16</sub>CuPc and their heterojunction.

The hysteresis curves of C6-DPA, F<sub>16</sub>CuPc and their heterojunction were shown in Fig. S13. The hysteresis of the p-channel was unchanged after the formation of heterojunction (Fig. S13a, c), which indicated that the quality of the C6-DPA/SiO<sub>2</sub> interface was unchanged. The hysteresis of the n-channel was reduced prominently after the formation of heterojunction (Fig. S13b, d), indicating that the quality of the F<sub>16</sub>CuPc/C6-DPA interface was much better than that of F<sub>16</sub>CuPc/SiO<sub>2</sub> interface.

One main reason for hysteresis of OFETs was charge trapping at the interface of organic semiconductor/dielectric interface.<sup>24-25</sup> The n-channel of heterojunction was in contact with the 2DMCs. Due to the high-quality of 2DMCs, F<sub>16</sub>CuPc/2DMCs interface had fewer electron traps than F<sub>16</sub>CuPc/SiO<sub>2</sub> interface. The other reason was that water and oxygen in the air can induce electron trap centers.<sup>26-27</sup> When F<sub>16</sub>CuPc was deposited on 2DMCs of C6-DPA, the grain size was large, which protected the film from the air and thus reduced charge trapping.<sup>28-29</sup> As a result, the n-channel of heterojunction aOFETs showed smaller hysteresis than that of single-component OFETs (Fig. S13).

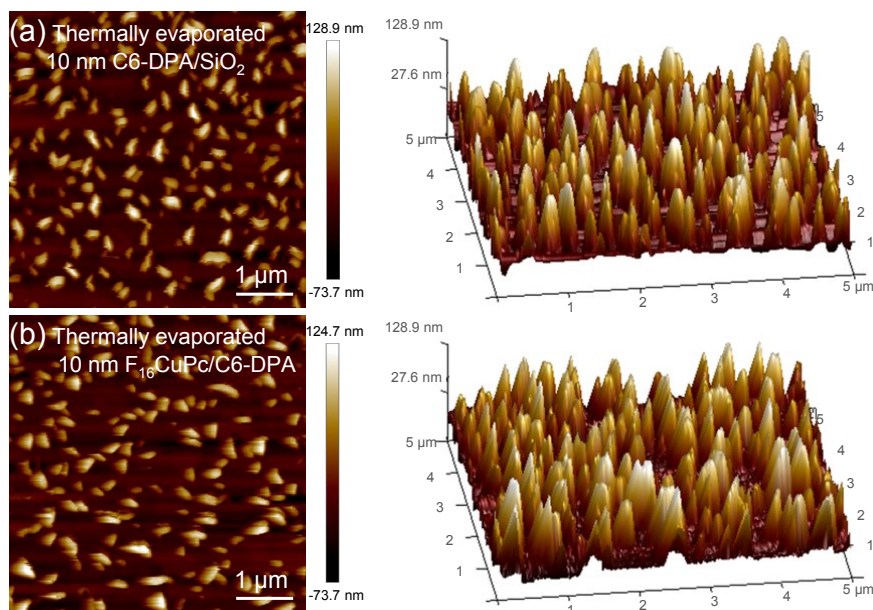

**Fig. S14** 2D and 3D AFM images of (a) polycrystalline thin film of C6-DPA prepared by thermal evaporation and (b) F<sub>16</sub>CuPc thermally evaporated on polycrystalline thin film of C6-DPA, respectively.

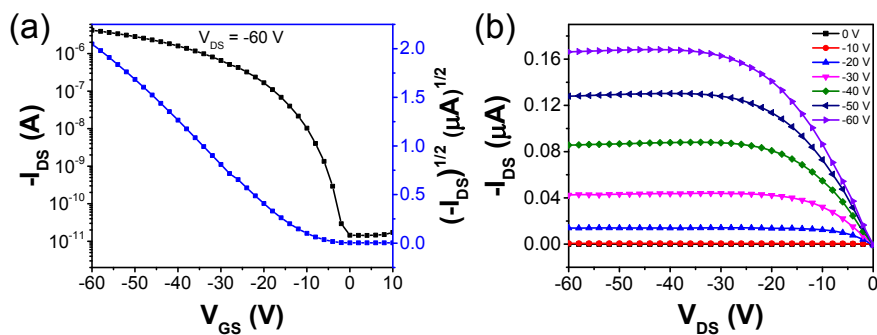

**Fig. S15** (a) Transfer and (b) output curves of an OFET based on thermally evaporated C6-DPA on SiO<sub>2</sub>. The hole mobility was 0.33 cm<sup>2</sup> V<sup>-1</sup> s<sup>-1</sup>, which was ~ 10 times smaller than that of 2DMC of C6-DPA (Fig. S12). The channel length was 155 μm and the channel width was 167 μm.

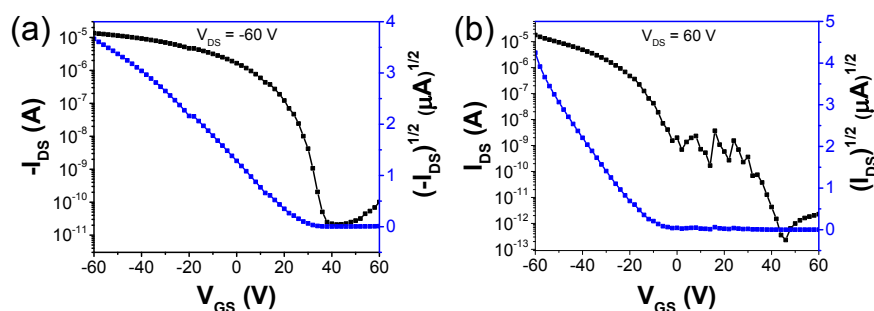

**Fig. S16** Typical transfer characteristics of thermally evaporated F<sub>16</sub>CuPc/C6-DPA aOFET under (a) negative and (b) positive drain bias, respectively. The channel length was 155 μm and the channel width was 168 μm.

The transfer characteristics of the two-step vacuum-deposition processed bilayer aOFET exhibited p-channel operation mode only with hole mobility of 0.34 cm<sup>2</sup> V<sup>-1</sup> s<sup>-1</sup>, and the n-channel mode was not observed. The poor performance was attributed to the poor morphology of the films and the rough interface between the C6-DPA and F<sub>16</sub>CuPc (Fig. S14).

## Reference

1. Z. Bao, A. J. Lovinger and J. Brown, *J. Am. Chem. Soc.*, 1998, **120**, 207.
2. S. N  non, D. Kanehira, N. Yoshimoto, F. Fages and C. Videlot-Ackermann, *Thin Solid Films*, 2010, **518**, 5593.
3. C.-L. Tsai, L.-S. Tsai and J.-C. Hwang, *Org. Electron.*, 2012, **13**, 3315.
4. Y. Zhou, S.-T. Han, Y. Yan, L.-B. Huang, L. Zhou, J. Huang and V. A. L. Roy, *Sci. Rep.*, 2013, **3**, 3093.
5. X. Shao, S. Wang, X. Li, Z. Su, Y. Chen and Y. Xiao, *Dyes Pigm.*, 2016, **132**, 378.
6. X. Zhang, Z. Wang, X. Zhou, Z. Wang, L. Huang and L. Chi, *Adv. Electron. Mater.*, 2017, **3**, 1700128.
7. J. Wang, H. Wang, X. Yan, H. Huang and D. Yan, *Chem. Phys. Lett.*, 2005, **407**, 87.
8. R. Ye, M. Baba, Y. Oishi, K. Mori and K. Suzuki, *Appl. Phys. Lett.*, 2005, **86**, 253505.
9. J. Wang, H. Wang, X. Yan, H. Huang, D. Jin, J. Shi, Y. Tang and D. Yan, *Adv. Funct. Mater.*, 2006, **16**, 824.
10. H. Wang, J. Wang, X. Yan, J. Shi, H. Tian, Y. Geng and D. Yan, *Appl. Phys. Lett.*, 2006, **88**, 133508.
11. H. Wang, J. Wang, H. Huang, X. Yan and D. Yan, *Org. Electron.*, 2006, **7**, 369.
12. H. Wang, F. Zhu, J. Yang, Y. Geng and D. Yan, *Adv. Mater.*, 2007, **19**, 2168.
13. J. Shi, H. Wang, D. Song, H. Tian, Y. Geng and D. Yan, *Adv. Funct. Mater.*, 2007, **17**, 397.
14. R. Ye, M. Baba, K. Suzuki and K. Mori, *Appl. Surf. Sci.*, 2008, **254**, 7885.
15. J. Shi, H. Wang, D. Song, H. Tian, Y. Geng and D. Yan, *Thin Solid Films*, 2008, **516**, 3270.

16. W. Gu, X. Li, H. Zhang, B. Wei, J. Zhang and J. Wang, *Thin Solid Films*, 2010, **519**, 439.
17. Y. Zhang, H. Dong, Q. Tang, S. Ferdous, F. Liu, S. C. B. Mannsfeld, W. Hu and A. L. Briseno, *J. Am. Chem. Soc.*, 2010, **132**, 11580.
18. S. N  non, D. Kanehira, N. Yoshimoto, F. Fages and C. Videlot-Ackermann, *Synth. Met.*, 2011, **161**, 1915.
19. M. Yi, N. Zhang, L. Xie and W. Huang, *J. Semicond.*, 2015, **36**, 104001.
20. S. Huang, B. Peng and P. K. L. Chan, *Adv. Electron. Mater.*, 2017, **3**, 1700268.
21. K. Eguchi, M. M. Matsushita and K. Awaga, *J. Phys. Chem. C*, 2018, **122**, 26054.
22. X. Zhu, Y. Zhang, X. Ren, J. Yao, S. Guo, L. Zhang, D. Wang, G. Wang, X. Zhang, R. Li and W. Hu, *Small*, 2019, **15**, 1902187.
23. Y. Gao, H. Ding, H. Wang and D. Yan, *Appl. Phys. Lett.*, 2007, **91**, 142112.
24. W. Huang, W. Shi, S. Han and J. Yua, *AIP Adv.*, 2013, **3**, 052122.
25. B. M. Egginger, M. Irimia-Vladu, R. Schw  diauer, A. Tanda, I. Frischauf, S. Bauer and N. S. Sariciftci, *Adv. Mater.*, 2008, **20**, 1018.
26. R. D. Pietro and H. Sirringhaus, *Adv. Mater.*, 2012, **24**, 3367.
27. R. D. Pietro, D. Fazzi, T. B. Kehoe and H. Sirringhaus, *J. Am. Chem. Soc.*, 2012, **134**, 14877.
28. C. Qian, J. Sun, L. Zhang, H. Xie, H. Huang, J. Yang and Y. Gao, *Synth. Met.*, 2015, **210**, 336.
29. C. Qian, J. Sun, L. Zhang, H. Huang, J. Yang and Y. Gao, *J. Phys. Chem. C*, 2015, **119**, 14965.
